# Supplementary material for: Effects of different grazing intensities on plant species diversity at different spatial scales in a desert steppe in Inner Mongolia
Source: PeerJ. 2025 Mar 19;13:e19087. doi: 10.7717/peerj.19087 (PMC11929504; doi:10.7717/peerj.19087)
Supplement: Supplemental Information 1 [file peerj-13-19087-s001.xlsx]

## Sheet: Sheet1
botanical name	Stipa breviflora	Cleistogenes songorica	Allium polyrhizum	Convolvulus ammannii	Neopallasia pectinata	Setaria viridis	Eragrostis pilosa	Kochia prostrata	Carex duriuscula subsp. stenophylloides	Artemisia capillaris Thunb．	Asparagus cochinchinensis	Astragalus galactites	Oxytropis racemosa Turcz.	Allium tenuissimum	Allium mongolicum	Cleistogenes squarrosa	Caragana stenophylla
plot	density	density	density	density	density	density	density	density	density	density	density	density	density	density	density	density	density
CK1	2	2	2	3	160	15	66				1			1	1		4
		3	3	30	100	3	120			6
	1		5	40	20	11	70			5	3		1				1
CK2	7	3	10	2	10	6		1		6			1				2
	2	5	15	9	10	2		1									10
	5	5	12	11	25		40	2	2	2							15
CK3	6	9	15	7	120	6	3	2		8	3	2
	8	6	10	40		9	20	3		8							1
	8	8	11	22		4	30		2		1						5
LG1	2	6	7	18	200		40		4	6							5
	5	10	7	16	9		13		8	25							2
	10	9	7	8	25				15	5	1						1
LG2	6	25	1	8	60		18										2
	9	11	1		100		5		3							6	4
	7	15		7	80		36		2								2
LG3	6	13		16	44	2	16			4							1
	10	8		48	56	7	9		7	18							3
	4	13		17	94		46		5	16							3
MG1	9	12	1	8	70	5	16
	5	8	1	5	20	3	60										3
	4	14	3	5	30		20		1								4
MG2	6	20		4	100	2	62										2
	5	14		7	130	3	80
	11	23		14	40		16		3								2
MG3	8	12		10	70	1	24			1							1
	4	5		7	40	1	40			5							1
	1	19		7	40		38			11							3
HG1	6	11		25	140	1	6			15
	3	16		35	110		13			7		1
	5	6		29	140	2	10			5
HG2	4	6		26	280		26										1
	12			24	200	1	8										3
		14		22	200	1	13										3
HG3	5	13		20	32	1	12		4								4
	2	9		19	81		9		7								1
	7	6		10	86		1		15
EG1	4	7		20	60	3	9			1
	4	4		27	20	1	16		2								2
	5	6		9	40	4	28			4
EG2	4	7		39	350	3	38					1					2
	4	8		6	200	8	39										4
	5	4		4	320	10	49
EG3	4	6		20	51		37					4					3
	4	6	2	13	40		36			1
	2	6	3	21	36		12		6	5							5
